# Supplementary material
Source: HighWire-hosted journal article supplement (https://bmjopen.bmj.com/content/12/9/e063230)
Supplement: inline-supplementary-material-3 [file inline-supplementary-material-3.pdf]

**SUPPLEMENTARY FILE 3****MEDLINE, Search conducted 11.02.22****Database:**

Ovid MEDLINE(R) ALL &lt;1946 to February 10, 2022&gt;

| #  | Query                                                                                                              | Results from 11 Feb 2022 |
|----|--------------------------------------------------------------------------------------------------------------------|--------------------------|
| 1  | dementia/ or alzheimer disease/ or dementia, vascular/ or frontotemporal lobar degeneration/ or lewy body disease/ | 160,450                  |
| 2  | Frontotemporal Dementia/ or Dementia, Multi-Infarct/                                                               | 4,719                    |
| 3  | Korsakoff Syndrome/                                                                                                | 530                      |
| 4  | Dementia.ab,ti.                                                                                                    | 121,195                  |
| 5  | "Alzheimer*" .ab,ti.                                                                                               | 163,697                  |
| 6  | Lewy body.ab,ti.                                                                                                   | 4,218                    |
| 7  | korsakoff.ab,ti.                                                                                                   | 985                      |
| 8  | 1 or 2 or 3 or 4 or 5 or 6 or 7                                                                                    | 265,108                  |
| 9  | exp Pain/ or exp Pain Measurement/ or exp Pain Management/                                                         | 471,353                  |
| 10 | Pain.ab,ti.                                                                                                        | 694,136                  |
| 11 | 9 or 10                                                                                                            | 872,991                  |
| 12 | "Care home*" .af.                                                                                                  | 5,045                    |
| 13 | Long term care.af.                                                                                                 | 46,819                   |
| 14 | Residential care.af.                                                                                               | 4,053                    |
| 15 | "nurs* home*" .af.                                                                                                 | 52,581                   |
| 16 | exp Residential Facilities/ or exp Nursing Homes/ or exp Homes for the Aged/ or exp Long-Term Care/                | 77,440                   |
| 17 | "Home* for the aged" .af.                                                                                          | 15,709                   |
| 18 | 12 or 13 or 14 or 15 or 16 or 17                                                                                   | 107,035                  |
| 19 | 8 and 11 and 18                                                                                                    | 750                      |
